# Supplementary material for: Complete Genome Sequence of a Novel Monopartite Mastrevirus, Soybean Geminivirus B, Isolated from Soybean (Glycine max (L.) Merrill)
Source: MDPI journal article supplement (doi:10.3390/plants11131768), 2022-07-03
Supplement: s1 [file s1]

SGVB\_genome 1 10 20 30 40 50 60  
KM229842.1 TAATATTACGGCGTGGCCACCTTATCGCGAGCCCTTTAGGGCGAGCGGTTTAGATTGAT  
.....

SGVB\_genome 70 80 90 100 110 120  
KM229842.1 TTGAAATTTAAAAAGTAAAGTTAGGCGGAAAGTGATTGTGCGATTACACATTTATATAA  
.....AT.....GAAAGT.....ATTTGTATCA

SGVB\_genome 130 140 150 160 170 180  
KM229842.1 AGGGGACATCAGAGTATACCGTATATGGAGCGTCTATTATACCAGGTATTCCTCGTAAAT  
...GGTATTT...TCCTCGGATACGA.....TTAT.....T

SGVB\_genome 190 200 210 220 230 240  
KM229842.1 TATACGCCATCTTACGAGTCTGAGAGTTATCTGCTCCGTGCGCAGGCTTCACGTAAACAAC  
CATACG...ATCTCT...CAGTGAG...TGCTGCTCCA...CAGGCTCATCTCAACG

SGVB\_genome 250 260 270 280 290 300  
KM229842.1 CAGTTGGGAAAGTTGTATCGCTTTGGTTATTTGTTCTGTGCGTGTAGGTTGTCTTAT  
GATTTGGTAAAGTTGTATCGCTTTGGTTATTTCTGTGTAGTGTGGTGTGTCTAT

SGVB\_genome 310 320 330 340 350 360  
KM229842.1 TAGGCTATCTTTATTTTAAAGATTGTATTTGTTATTTAAAGCCAAAGAGCAGAGG  
CTGGCTATACCTTCTTTAAAGATTGTATCTCTGTTCAAGGCCAAGAAAGCAGAG

SGVB\_genome 370 380 390 400 410  
KM229842.1 ACACGACCGAAATAGGGTTTGGAAATACCCCTGCT...AGGCCCG...TTCTCAACCT  
ACACATACCGAAATCGGGTTTGGCAACCCCGCTCGAATCAGGATCATCTCAACCT

SGVB\_genome 420 430 440 450 460 470  
KM229842.1 GCAAAAATGGTGGGACCTTATAAGGTACGTTCTACAAGGAGGAGAGAGGAAGGAACGC  
GTA.GGCGGGGTGCATCATGTCGACTGTACGT...GGGAAAGAGAGCGGAAGCGTAGC

SGVB\_genome 480 490 500 510 520 530  
KM229842.1 TAGGGTTTATGATGCACTGGTGTGTTAACTCCCAAGGGATCTGAGTCAAAGCTCCATCAA  
GGAAGGAGATCAAGGGCGAAGAGT.....AGGGATCTGTGTC...CTATGTGCTCA

SGVB\_genome 540 550 560 570 580 590  
KM229842.1 GGTCTATTTCGAATAGACGTGAATCTTGCAGGTTGCAACGTTCACTTGGACCAAGTTCTG  
GGTCCTGTCTTCCAGAGGGAATCTTGCAGGTGCAACCTTTCTCTGGACCAAGTTCTG

SGVB\_genome 600 610 620 630 640 650  
KM229842.1 GTGCGGGGTGTAAGTTTCTGCTGGTGGGCTGCTTTCTGTGTAAGCAATTTCCACAGG  
GTTCGGGTATAAAGTTTCTGCTGGTGGGCTGCTCTACCTGTGAGTAATTTCCACAGG

SGVB\_genome 660 670 680 690 700 710  
KM229842.1 GTGCCAATGATAACTGCGTCACACCAACAAGACAATCTGTGTACAAAGTTATGTCGAAGA  
GTGCCAATGATAACTGCGTCACACCAACAAGACGTCGTATATTAATTATGCTAAGA

SGVB\_genome 720 730 740 750 760 770  
KM229842.1 ACAGTGTGTATGFGAATGCTCTCACTATCGGAAGGTTTTCGGTGCCCTGTACGTTTT  
ATACGTGTGTATTTGGAATCTAGTCACTATTCGAAGGTTTTCAGGTGCCCTTTTACTTTTT

SGVB\_genome 780 790 800 810 820 830  
KM229842.1 GGTGTGTGTATGACAAATCACTGGGTCTAGTATTTCCTAGTACGGGATATTCTTGAAG  
GGCTGTGTGTACGACAAAGCTCCTGGTGTCTATGTTCCAGTACGAGTGACATATTTGAAG

SGVB\_genome 840 850 860 870 880 890  
KM229842.1 GTCTCTCTGTGTGTTTCCTAATAACCCGAAAGTGTGGTCTAGTTCAGGGCAGCATGTCTATC  
GCCATCTCTGTGTTTCCGAACAACTCTTGTGACGTGGATCTGTCTAGGGCTGCATGCTCATC

SGVB\_genome 900 910 920 930 940 950  
KM229842.1 GCTTTGTGTGTAAAGAAACGTTGGACCGTGATGCTTTGAGTGTAAAGGTGTTGACCAAGC  
GTTTTGTGTGTAAAGAAACGTTGGACCGTGATAGTGGAGAGCAATGGGTATTGACCAAGGA

SGVB\_genome 960 970 980 990 1000 1010  
KM229842.1 AAGGCCCAGAGTGCAGAGTTATTATGGGCCTGGTCCGTGTAAACAGGTGAAGTTGTCTCC  
AAGGCCCAGAGTGTCTACATATTATGGGCCTGGTCCGTGTAAACAGATTAACTCTGTAAT

SGVB\_genome 1020 1030 1040 1050 1060 1070  
KM229842.1 AAGTTCTTCAAGAGATTGGGTGTAGCACTGAGTGGAAAGATAGTTCTACGGGTGATGTA  
AAGTTCTTTAAGAGATTGGGTGTGTCAACGGAGTGGAAAGATAGTTCTACGGGTGATGTT

SGVB\_genome 1080 1090 1100 1110 1120 1130  
KM229842.1 GGTGATATAAAAGAAAGGCGCAATGTACATTGTTGTTCCTCTCCAGAAAGTCTGATGTG  
GGTGATATAAAAGAAAGGAGCCCTTTACATTGTTGTTCCTCTCCAGAAAGTCTGATGTAT

SGVB\_genome 1140 1150 1160 1170 1180 1190  
KM229842.1 TATGTAAATGGTTATTTCCGAGTGTACTTCAAGTCCGTTGGTAATCAATAAAATAAGTTT  
TATGTAAATGGTTATTTCCGAGTGTACTTCAAGTCCGTTGGTAATCAATAAAATAATTTT

SGVB\_genome 1200 1210 1220 1230 1240  
KM229842.1 TATTATGTTTATTAATATATGCTTCAAGTATGAGAGAAAATTACAAAGTACAA  
TATTATGAAATATGTAATATGCTTCAAGTATGAGAGAAAATTACAAATACAAATACACACG

SGVB\_genome 1250 1260 1270 1280 1290 1300  
KM229842.1 ACATAAACACACAAAAACACACAAAAAAAGAGAAACAAATCACACCCCAACATATTAC  
AAATAAACATAAAAAACACACCTAAAAAAGAGCAAAACACACCCATAACATATAC

SGVB\_genome 1310 1320 1330 1340 1350 1360  
KM229842.1 AGTATAGTGAACCTCTAGTTAGAGAGAGGCACGTTTAGTGACTCGACGCAACCTGAGCA  
ACTAGAATACCTCTGCTTGGAGAGAGGCACGTTTCTGACTCGACGATTCTCGAGCA

SGVB\_genome 1370 1380 1390 1400 1410 1420  
KM229842.1 AAAAAATGTTCTTCGATCAACATGTATGGATTACACAATTAGCTTCAAAGTATCTTTC  
AAAAAAGTCTCCGTCATACATGTATGGGTGAGACAATTATCTTCAAAGTATCTCTTC

1430 1440 1450 1460 1470 1480  
SGVB\_genome TGTGAGATGTCATATTATGCATCCAGTCTTCGTCTCATTGCAAAATGATTATGAAGGG  
KM229842.1 TGTGAGCTGACATTGAGAGCATCCAGTCTTCGTCTGGATTACAAAGATTATGAAGGG

1490 1500 1510 1520 1530 1540  
SGVB\_genome ATCCACCTTTTATTTCTTCTTTTTCATATTTAGGGTTGACAGTGTAGTCACTGG  
KM229842.1 ATCCACCTTTTATTTCTTCTTTTTCATATTTAGGGTTGACAGTAAATCACTGG

1550 1560 1570 1580 1590 1600  
SGVB\_genome CAACCTATTAATTGCTTCCAAGTGGGACGAAATTGAAGGGGATGTCGTCAATGACGTTG  
KM229842.1 CAACCTATTAATTGCTTCCAAGTGGGACGAACTGAAGGGGATGTCGTCAATGACGTTG

1610 1620 1630 1640 1650 1660  
SGVB\_genome TAGGTGCGATGTCGTCGTAGTGTGTAGTCGATGGTCCGTTCCAGTAAATTGTGTCTGT  
KM229842.1 TAGGTGCGATGTCGTCGTAGTGTGTGTAGTCGATGGTCCGTTCCAGTAAATTGTGTCTGT

1670 1680 1690 1700 1710 1720  
SGVB\_genome CCGAGGCTTCTTGCCCATGTGTCTCTTGCCGGTCTGTGTTGGTCCGCAGATGTAGAGGGA  
KM229842.1 CCGAGGCTTCTTGCCCATGTGTCTCTTGCCGGTCTGTGTTGGTCCGCAGATGTAGAGGCTG

1730 1740 1750 1760 1770 1780  
SGVB\_genome GGGTCTCTGGTTCAGTCCCTCTCGTCTGGTTAAATCGCCATCCATTCAAGGTCAG  
KM229842.1 GGGTCTCTGGTTCAGTCCCTCTCGTCTGGTTAAATCGCCATCCATTCAAGGTCAG

1790 1800 1810 1820 1830 1840  
SGVB\_genome CTTGGGCTTCACTATATGGGACTGGATGTTATATGTGTAGCGTCAATACCTTACATGAT  
KM229842.1 CTTGGGCTTCACTATATGAACTGGATGTTATATGTGTAGCGTCAATACCTTACATGAT

1850 1860 1870 1880 1890 1900  
SGVB\_genome ATAGATGTGTGTCCTCCAAGTGGCTAGCTCTTCGTGGCAGCGAAGATCTTGTGCTGCT  
KM229842.1 ATAGATGTGTGTCCTCCAAGTGGCTAGCTCTTCGTGGCAGCGAAGATCTTGTGCTGCT

1910 1920 1930 1940 1950 1960  
SGVB\_genome GATGGAAAGGTACATATGTTTGGTTGTGGTGGAAAGAGCCGTGTTGCTGAGTATTCATG  
KM229842.1 GATGGAAAGGTACATATGTTTGGTTGTGGTGGAAAGAAATTGTTGCTGAGTATTCATG

1970 1980 1990 2000 2010 2020  
SGVB\_genome CCACTGTATATTAGTGCCCATTCATGAGGAAATTGTTCTTTGATCATCTCGAGATATTC  
KM229842.1 CCACTGTATATTAGTGCCCATTCATGAGGAAATTGTTCTTTGATCATCTCGAGATATTC

2030 2040 2050 2060 2070 2080  
SGVB\_genome CTCCTTAGATGTTGCAGTCTGGATAAATAGTTCTCCATCGTGCATCAGATTTTGAAGGAGA  
KM229842.1 CTCCTTAGACGTTGCAGTCTGGATAAATAGTTCTCCATCGTGCATCAGATTTGCGAGGAGA

2090 2100 2110 2120 2130 2140  
SGVB\_genome GACTCGATGATCTTTGAAGTCTCCTCTGGTTTGAACATCTCCGTCCTTAGAATGTGATTC  
KM229842.1 GACTCTATGATCTCTGAAATCTCCTCTGGTTTGAATATCTCCGTCCTTAGAATGTGATTC

2150 2160 2170 2180 2190 2200

SGVB\_genome AAGGACTTGTGTTAGAGTTTCTAGCTGGT TGGATATTAGGGTGATTTCCCTTCAAATCGAA  
 KM229842.1 AAGGACTTGTGTTAGAGTTTCTAGCTGGC TGGATATTAGGGTGATTTCCCTTCAAATCGAA

2210 2220 2230 2240 2250 2260

SGVB\_genome AAAAGAAGATCCCTAATCAAGGTTTTTTATCAAGTTGATAAAGAGCGTGTA TGGGT  
 KM229842.1 AAAAGAAGATCCCTAATCAAGGTTTTTTATCAAGTTGATAAAGAGCA TGA TAG TGGGT

2270 2280 2290 2300 2310 2320

SGVB\_genome AGTGCCATCTTGATGAAATTCAGTAGCAATAGCAAGGTAAATAAATAAAGGTGTAG  
 KM229842.1 AGTGCCATCTTGATGAAATTCAGTAGCAATAGCAAGGTAAATAAATAAAGGTGTAG

2330 2340 2350 2360 2370 2380

SGVB\_genome CTTTCCCAGAGAACTCGAAGAGTTCATCTCTCTGSGAAGAACATTTGGGATGTGAG  
 KM229842.1 TTTCCCAGAGAACTCGAAGAGTTCATCTCTCTGSGAAGAACATTTGGGATGTGAG

2390 2400 2410 2420 2430 2440

SGVB\_genome GAAAACATATTTTATTGAGTCTGAAATGAGCGTTGGGTCTTCGAGGCATTTGAAGTA  
 KM229842.1 GAAAACATATTTTATTGAGTCTGAAATGAGCGTTGGGTCTTCGAGGCATTTGAAGTA

2450 2460 2470 2480 2490

SGVB\_genome A GTTGTGACTCCATACAGTGATCCCAAACCTCTATTTATAACAGGCGTGGAGGCATGG  
 KM229842.1 GTTGTGACTCCGAGGGGTG.CCAAAACCTCTATCTATAACAGGCGTGGAGGCATGG

2500 2510 2520 2530 2540 2550

SGVB\_genome AGGCAAGGGCATTCTGTGTAATTGGAAGATAGTGGAAATTGACGTGGCATTACTTTAGA  
 KM229842.1 AGGCAAGGGCATTCTGTGTAATTGGAATATAGTGGAAATGACGTGGCATTACTTTAG

2560 2570 2580

SGVB\_genome AA TTAAG.....TT.....TTAAAT.....CTTTCGC.A  
 KM229842.1 CG TTAAGGGGGAAATCCACGCCGAAATTAATATTACCGCGTGGTCCCCCTTTCGC.A

2590 2600 2610

SGVB\_genome GAA....AGTGC.....CGGCGAT...AAGGTGGG....TCACGCCCATTT.....  
 KM229842.1 GCACTTTAGTGCAGCGGTCCAGATTTAAAGTGGTAAATTTCCCGGCCCATAGGGTTTGT

SGVB\_genome .....  
 KM229842.1 CTTGCTTTTGCTTTATAAAAGGCGCACTAATGTATAGACCGTAGA

Figure S1. Pairwise sequence alignment of full-length SGVB and CpCDV isolate CpCDV\_H\_SD\_SD180\_2013.
